# Supplementary material for: Increased intracellular Cl- concentration improves airway epithelial migration by activating the RhoA/ROCK Pathway
Source: PubMed Central journal article supplement (PMC7392015; doi:10.7150/thno.46002), 2020-07-09
Supplement: thnov10p8528s1.pdf [file thnov10p8528s1.pdf]

## Supplementary figure

### Figure S1

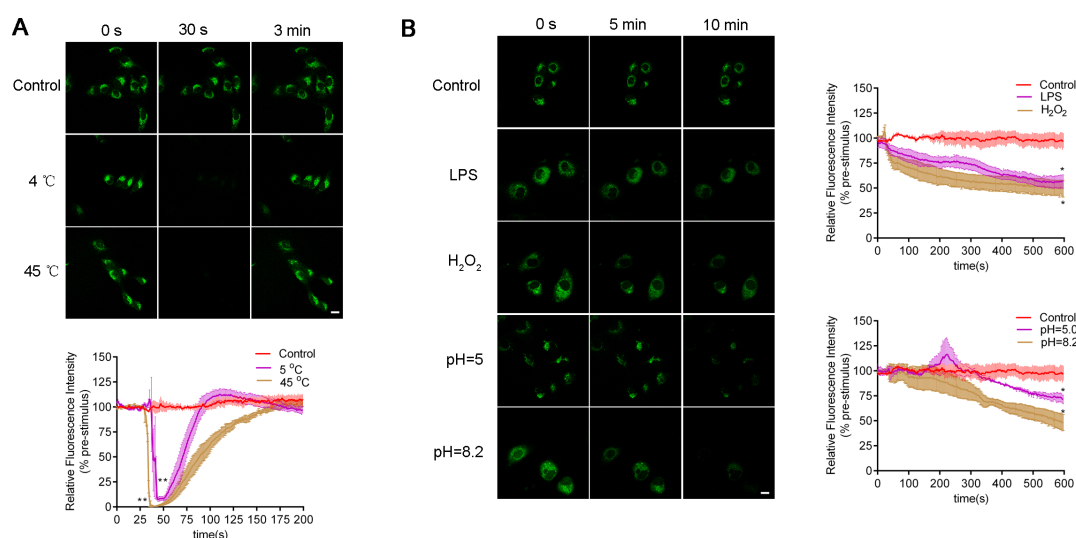

**Figure S1.** Various stimuli increase intracellular  $\text{Cl}^-$  levels in 16HBE14o- cells.

16HBE14o- cells were cultured on Glass Bottom Cell Culture Dish (801002, NEST, China).

Cells were subsequently loaded with 5 mM

MQAE(N-(ethoxycarbonylmethyl)-6-methoxyquinolium bromide; ab145418, Abcam) in the

dark for 1 h at 37 °C and washed twice to remove the unbound probe. Then, various

stimuli including cold (5 °C), hot (45 °C), acid (pH=3.6), alkali (pH=8.2), hydrogen

peroxide ( $\text{H}_2\text{O}_2$ , 15 mM) and LPS (35  $\mu\text{g}/\text{ml}$ ) HEPES buffers were added to the culture

dish. Confocal microscopy scanning of the process was accomplished within 3-10 min. In

each set of experiment, images were taken using the same parameter settings.

**A-B)** Left panel shows representative confocal microscopy images of

16HBE14o- cells, which were loaded with MQAE (a  $\text{Cl}^-$  indicator), before and

after application of coldness (4°C), hot (45°C), acid (pH=5), alkali (pH=8.2),

$\text{H}_2\text{O}_2$  (15 mM) and LPS (35  $\mu\text{g}/\text{ml}$ ) to the basolateral bath. Right panel shows

summary plots of relative fluorescence intensity of MQAE indicating the

change levels of intracellular  $\text{Cl}^-$  ( $n=3$  independent experiments;  $*P < 0.05$ ;  $**P < 0.01$ ).

## Figure S2

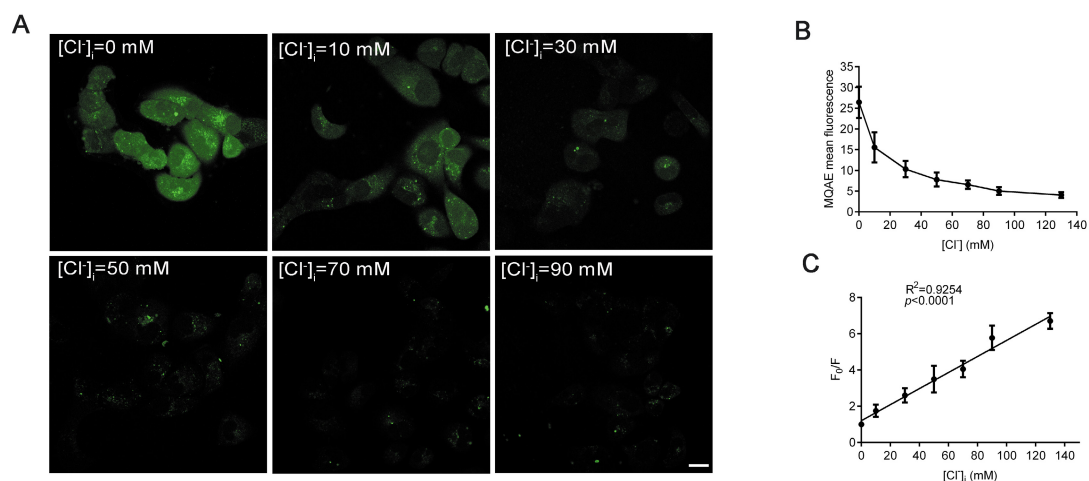

**Figure S2.** Intracellular quenching of MQAE by chloride ion in 16HBE14o- cells. **A-B)** Correlation between the intracellular chloride concentrations and the mean fluorescence intensities of MQAE were obtained in 16HBE14o- cells ( $n=100-180$  cells for each group; Scale bars:  $20\ \mu\text{m}$ ). Cells were incubated with buffers at various chloride concentrations (0, 10, 30, 50, 70, 90 and 130 mM) in the presence of the ionophores tributyltin ( $10\ \mu\text{M}$ ) and nigericin ( $5\ \mu\text{M}$ ), for 1 h. **C)** Stern-Volmer plot analysis ( $F_0/F-1=K_{\text{Cl}^-} [\text{Cl}^-]$ ) for the double ionophore strategy. The regression line gives the Stern-Volmer constant ( $K_{\text{SV}}$ ; slope of the line) of  $22.71 \pm 1.53\ \text{M}^{-1}$  ( $n=3$  independent experiments). Data are presented as mean  $\pm$  SD.
